# Supplementary material for: Integrated algorithm combining plasma biomarkers and cognitive assessments accurately predicts brain β-amyloid pathology
Source: PubMed Central journal article supplement (PMC10172320; doi:10.1038/s43856-023-00295-9), 2023-05-10
Supplement: 43856_2023_295_MOESM1_ESM.pdf [file 43856_2023_295_MOESM1_ESM.pdf]

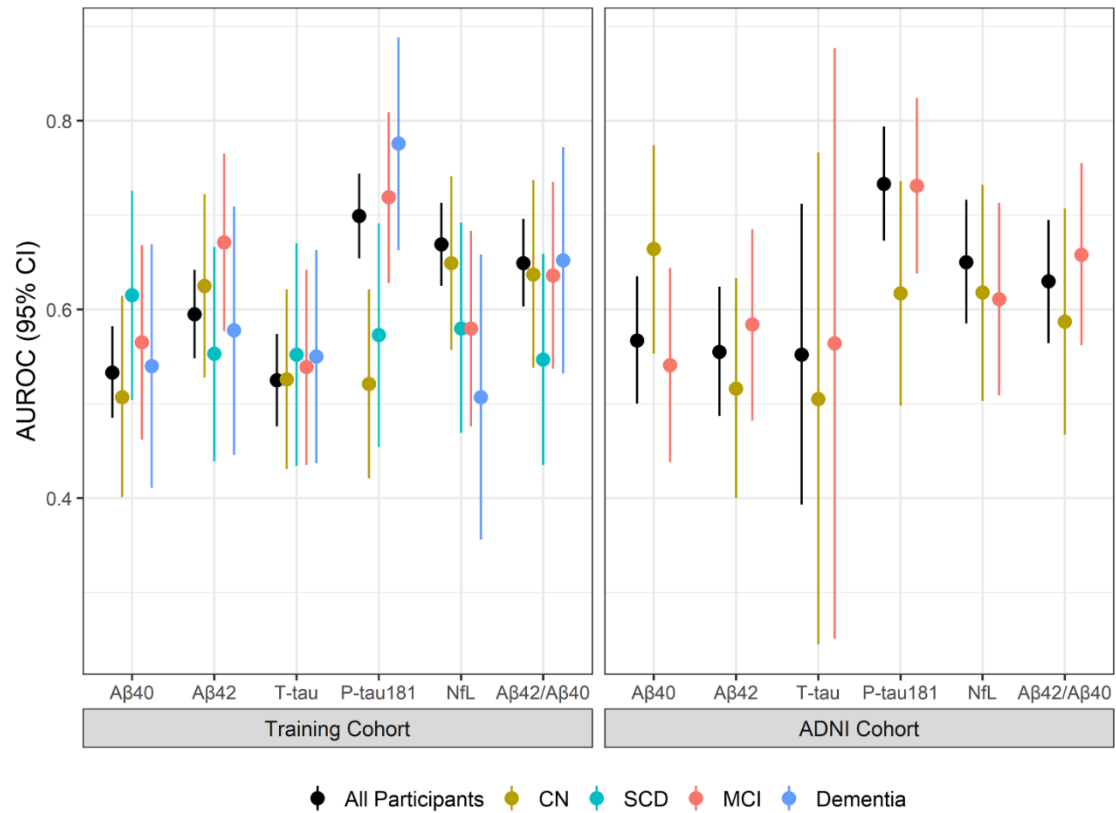

**Supplementary Figure 1. Single biomarker performances on Aβ-PET positivity prediction in different diagnostic groups.** AUROC values and the corresponding 95% confidence intervals of each individual plasma biomarkers for predicting Aβ-PET positivity in different diagnostic groups (Training Cohort: All participants: n = 609, CN: n = 238, SCD: n = 118, MCI: n = 135, Dementia: n = 118; ADNI Cohort: All participants: n = 284, CN: n = 97, MCI: n = 124) were shown. All values were calculated by receiver operating characteristic (ROC) analyses to evaluate the ability of plasma Aβ40, Aβ42, T-tau, P-tau181, NfL and Aβ42/Aβ40 in identifying Aβ-PET positive independently. Detailed results were shown in **Supplementary Table 3.**

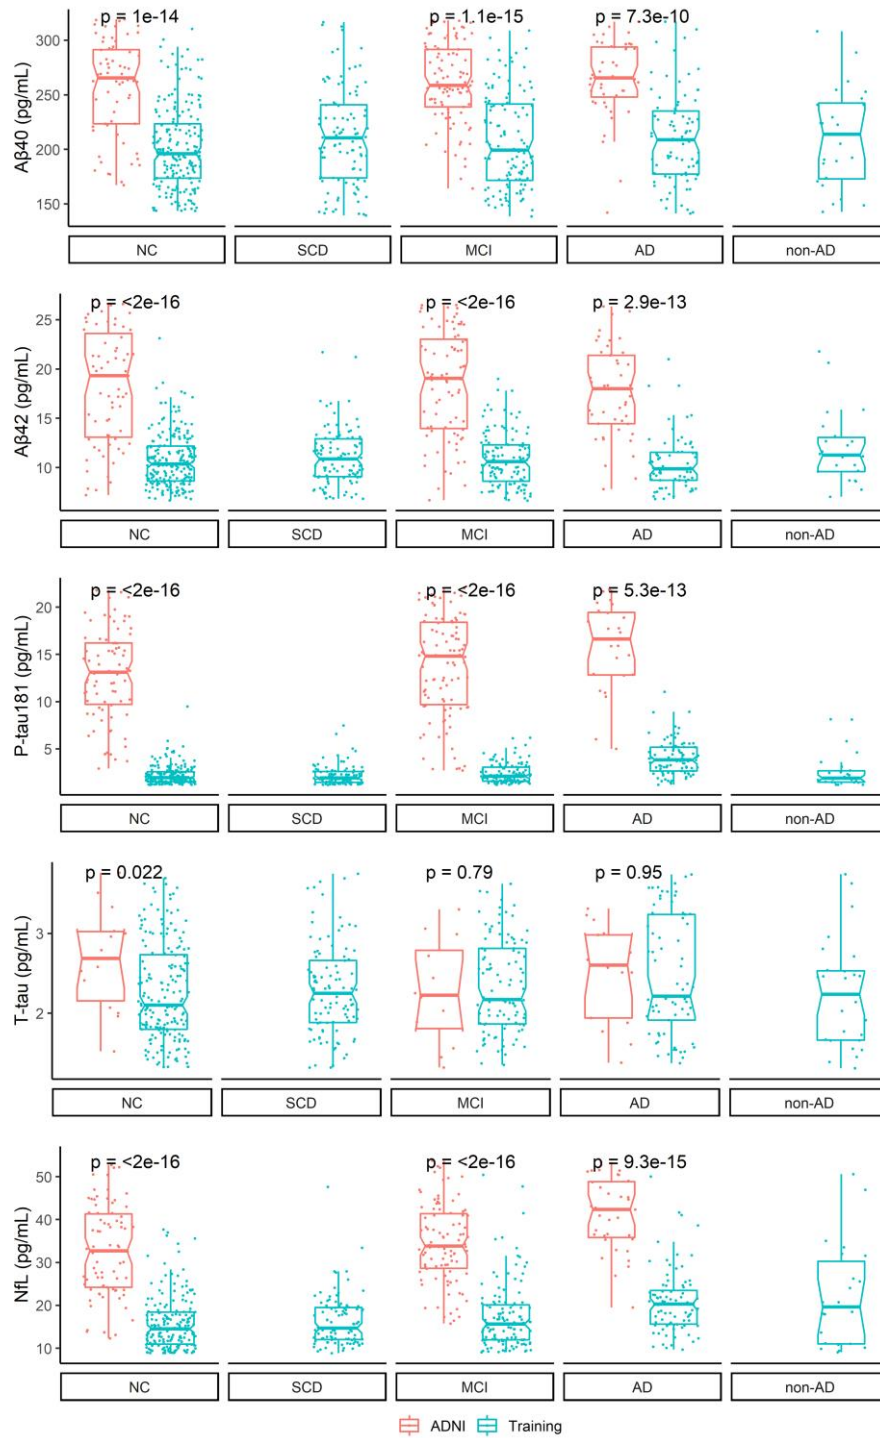

**Supplementary Figure 2. Comparison of the levels of Aβ40, Aβ42, P-tau181, T-tau, and NfL in blood between ADNI and training cohort.** Y axis shows the raw value of Aβ40, Aβ42, P-tau181, T-tau, and NfL. P value was calculated using Mann-Whitney U test. non-AD: non-Alzheimer’s disease dementia. The box shows the 25th percentile, the median, and the 75th percentile of the corresponding data. The whisker lines shows the maximum and minimum value. Minimum value is calculated by  $Q1 - 1.5 \times IQR$  and maximum is calculated by  $Q3 + 1.5 \times IQR$ . IQR: Interquartile range.

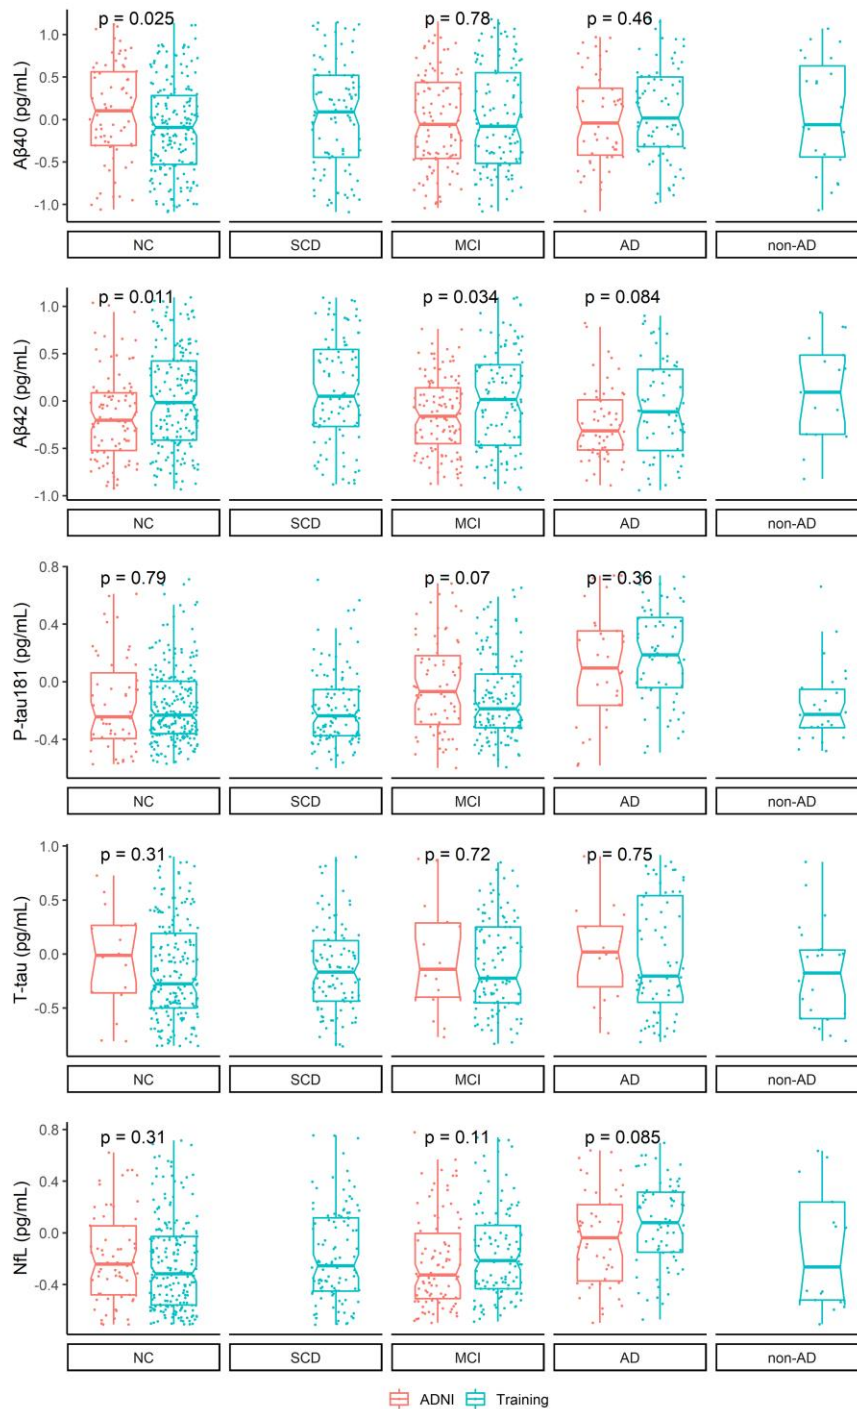

**Supplementary Figure 3. Comparison of the levels of scaled A $\beta$ 40, A $\beta$ 42, P-tau181, T-tau, and NfL in blood between ADNI and training cohort.** Y axis shows z-score transformed value within their own dataset.

P value was calculated using Mann-Whitney U test. non-AD: non-Alzheimer's disease dementia. The box shows the 25th percentile, the median, and the 75th percentile of the corresponding data. The whisker lines shows the maximum and minimum value. Minimum value is calculated by  $Q1 - 1.5 \cdot IQR$  and maximum is calculated by  $Q3 + 1.5 \cdot IQR$ .

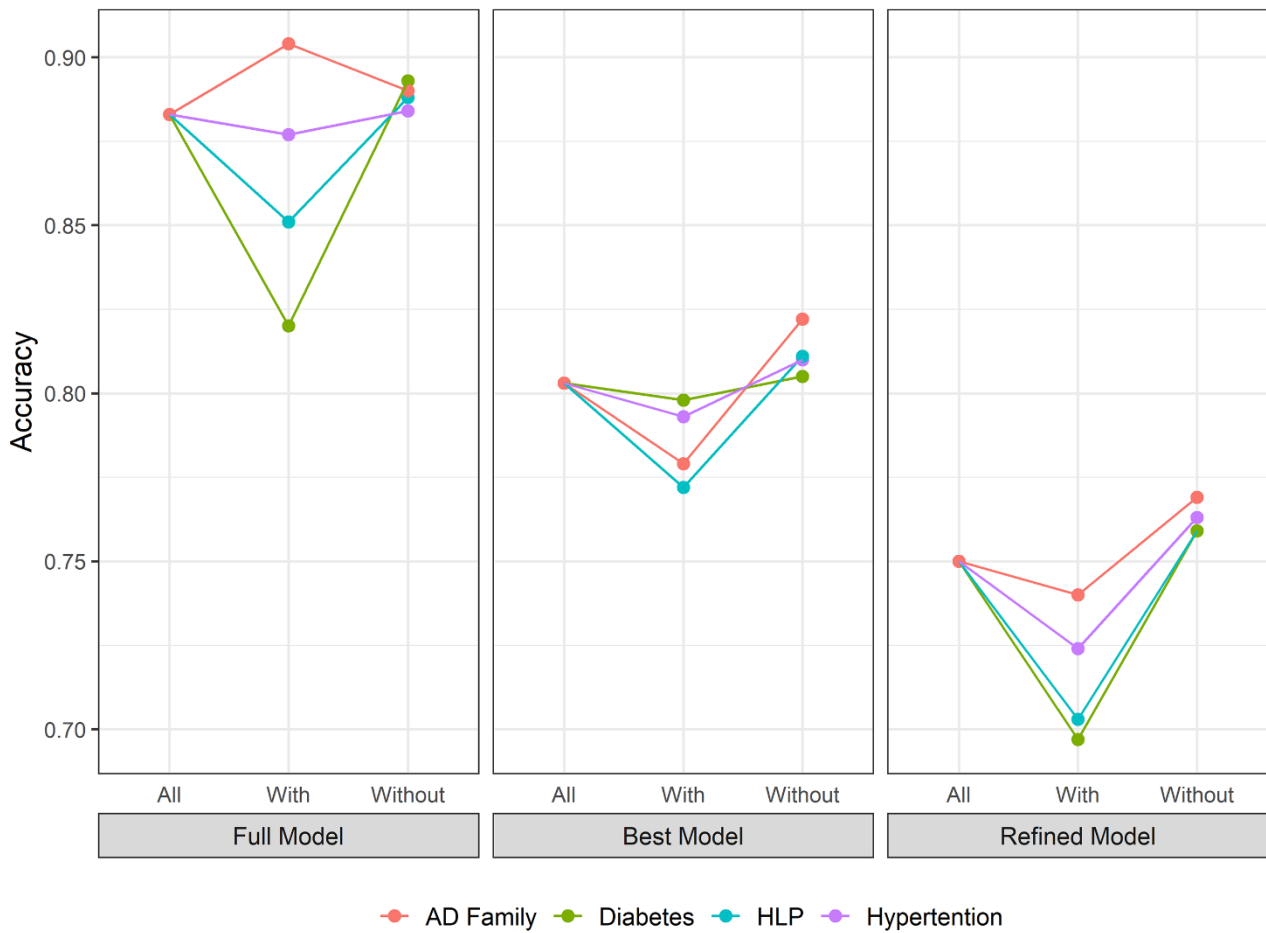

**Supplementary Figure 4. Model performances in patients with comorbidities and family histories.**

Accuracy of the established models for predicting A $\beta$ -PET positivity in participants associated with comorbidities and family history were shown. (AD Family History: n = 382, Diabetes: n = 566, HLP: n = 566, Hypertension: n = 566).

**Supplementary Table 1. Plasma biomarker levels in different diagnostic groups by PET status**

|                 |                                              | All patients        |                     | CN                  |                    | SCD                |                    | MCI                |                    | Dementia           |                    |
|-----------------|----------------------------------------------|---------------------|---------------------|---------------------|--------------------|--------------------|--------------------|--------------------|--------------------|--------------------|--------------------|
|                 |                                              | A $\beta$ -         | A $\beta$ +         | A $\beta$ -         | A $\beta$ +        | A $\beta$ -        | A $\beta$ +        | A $\beta$ -        | A $\beta$ +        | A $\beta$ -        | A $\beta$ +        |
| Training Cohort | N                                            | N = 385<br>(63.22%) | N = 224<br>(36.78%) | N = 192<br>(80.67%) | N = 46<br>(19.33%) | N = 82<br>(69.49%) | N = 36<br>(30.51%) | N = 82<br>(60.74%) | N = 53<br>(39.26%) | N = 29<br>(24.58%) | N = 89<br>(75.42%) |
|                 | A $\beta$ 40 (pg/mL) <sup>a</sup>            | 195.0 (60.2)        | 198.2 (64.5)        | 191.8 (57.1)        | 185.8 (87.4)       | 197.7 (74.3)       | 216.0 (57.8)*      | 200.3 (52.6)       | 189.9 (58.0)       | 194.0 (57.1)       | 202.4 (55.0)       |
|                 | A $\beta$ 42 (pg/mL) <sup>a</sup>            | 10.4 (3.4)          | 9.2 (3.5)***        | 10.3 (3.1)          | 8.5 (4.2)**        | 10.0 (3.8)         | 10.5 (3.2)         | 11.0 (2.9)         | 9.0 (3.1)***       | 10.2 (4.8)         | 9.1 (3.5)          |
|                 | T-tau (pg/mL) <sup>a</sup>                   | 2.4 (1.0)           | 2.6 (1.8)           | 2.4 (1.1)           | 2.6 (2.4)          | 2.4 (0.9)          | 2.5 (1.1)          | 2.4 (1.0)          | 2.8 (2.3)          | 2.3 (0.8)          | 2.6 (1.2)          |
|                 | P-tau181 (pg/mL) <sup>a</sup>                | 2.0 (1.1)           | 3.3 (5.0)***        | 2.0 (1.0)           | 2.1 (1.5)          | 1.9 (1.2)          | 2.1 (1.0)          | 1.8 (0.7)          | 2.8 (1.3)***       | 2.5 (1.9)          | 4.0 (1.9)***       |
|                 | NfL (pg/mL) <sup>a</sup>                     | 15.9 (14.1)         | 19.9 (13.4)***      | 13.9 (8.6)          | 17.6 (9.8)**       | 14.2 (6.5)         | 15.6 (6.1)         | 17.4 (18.0)        | 18.0 (8.3)         | 29.7 (30.5)        | 24.0 (17.9)        |
|                 | A $\beta$ 42/A $\beta$ 40 ratio <sup>a</sup> | 0.0546 (0.015)      | 0.0482 (0.017)***   | 0.0550 (0.014)      | 0.0486 (0.017)**   | 0.0527 (0.013)     | 0.0498 (0.012)     | 0.0570 (0.019)     | 0.0506 (0.017)**   | 0.0511 (0.016)     | 0.0460 (0.017)*    |
|                 |                                              | A $\beta$ -         | A $\beta$ +         | A $\beta$ -         | A $\beta$ +        | A $\beta$ -        | A $\beta$ +        | A $\beta$ -        | A $\beta$ +        | A $\beta$ -        | A $\beta$ +        |
| ADNI Cohort     | N                                            | N = 122<br>(42.96%) | N = 162<br>(57.04%) | N = 61<br>(62.89%)  | N = 36<br>(37.11%) | NA                 | NA                 | N = 56<br>(45.16%) | N = 68<br>(54.84%) | N = 5<br>(7.94%)   | N = 58<br>(92.06%) |
|                 | A $\beta$ 40 (pg/mL) <sup>a</sup>            | 275.0 (66.3)        | 288.0 (63.6)        | 271.9 (74.0)        | 311.6 (66.1)**     | NA                 | NA                 | 276.9 (59.3)       | 284.3 (55.0)       | 291.6 (42.8)       | 277.8 (68.6)       |
|                 | A $\beta$ 42 (pg/mL) <sup>a</sup>            | 26.7 (17.4)         | 24.7 (21.5)         | 24.4 (12.7)         | 30.7 (38.0)        | NA                 | NA                 | 29.5 (21.8)        | 23.1 (11.3)        | 22.8 (5.5)         | 22.8 (15.6)        |
|                 | T-tau (pg/mL) <sup>a</sup>                   | 2.4 (1.6)           | 2.7 (1.6)           | 2.4 (1.6)           | 2.3 (0.6)          | NA                 | NA                 | 2.5 (2.2)          | 2.7 (1.9)          | 2.3 (0.5)          | 2.8 (1.7)          |
|                 | P-tau181 (pg/mL) <sup>a</sup>                | 15.8 (11.1)         | 22.5 (11.4)***      | 15.7 (9.4)          | 19.1 (13.5)        | NA                 | NA                 | 15.9 (13.1)        | 20.5 (9.0)***      | 15.7 (6.6)         | 27.1 (11.3)*       |
|                 | NfL (pg/mL) <sup>a</sup>                     | 43.0 (28.4)         | 53.0 (32.9)***      | 39.5 (25.9)         | 49.0 (30.5)        | NA                 | NA                 | 43.4 (28.2)        | 51.1 (38.6)*       | 81.5 (36.4)        | 57.8 (26.3)        |
|                 | A $\beta$ 42/A $\beta$ 40 ratio <sup>a</sup> | 0.0937 (0.044)      | 0.0865 (0.074)***   | 0.0865 (0.030)      | 0.0914 (0.076)     | NA                 | NA                 | 0.1030 (0.056)     | 0.0810 (0.039)**   | 0.0789 (0.017)     | 0.0898 (0.101)     |

\* p-value < 0.05; \*\* p-value < 0.01, \*\*\* p-value < 0.001 (Mann-Whitney Test between PET positive/negative groups)

<sup>a</sup>: Median and Standard Deviation (sd)

Data are shown as mean (s.d.) or n (%). Group comparisons were performed using the Mann-Whitney U test. Note that no SCD patients in the ADNI cohort contained all five biomarkers, thus were excluded from this study.

**Supplementary Table 2. The Distribution of APOE genotypes in diagnostic groups**

| Index                                                          | All participants<br>(N = 609) | CN<br>(N=238) | SCD<br>(N=118) | MCI<br>(N=135) | AD<br>(N=89) | Non-AD<br>(N=29) |
|----------------------------------------------------------------|-------------------------------|---------------|----------------|----------------|--------------|------------------|
| APOE $\epsilon 2/\epsilon 2$ or $\epsilon 2/\epsilon 3$ , N(%) | 72 (11.8%)                    | 32 (13.4%)    | 13 (11.0%)     | 17 (12.6%)     | 6 (6.7%)     | 4 (13.8%)        |
| APOE $\epsilon 3/\epsilon 3$ , N(%)                            | 376 (61.7%)                   | 155 (65.1%)   | 88 (74.6%)     | 78 (57.8%)     | 36 (40.4%)   | 19 (65.5%)       |
| APOE $\epsilon 2/\epsilon 4$ or $\epsilon 3/\epsilon 4$ , N(%) | 142 (23.3%)                   | 48 (20.2%)    | 17 (14.4%)     | 36 (26.7%)     | 35 (39.3%)   | 6 (20.7%)        |
| APOE $\epsilon 4/\epsilon 4$ , N(%)                            | 19 (3.1%)                     | 3 (1.3%)      | 0 (0.0%)       | 4 (3.0%)       | 12 (13.5%)   | 0 (0.0%)         |

**Supplementary Table 3. Single biomarker performances on A $\beta$ -PET positivity prediction in different diagnostic status**

|                 |                           | Overall               | CN                    | SCD                   | MCI                   | Dementia              |
|-----------------|---------------------------|-----------------------|-----------------------|-----------------------|-----------------------|-----------------------|
| Training Cohort | A $\beta$ 40              | 0.535 (0.487 – 0.583) | 0.506 (0.400 – 0.613) | 0.631 (0.521 – 0.740) | 0.565 (0.462 – 0.668) | 0.540 (0.411 – 0.669) |
|                 | A $\beta$ 42              | 0.594 (0.546 – 0.641) | 0.626 (0.529 – 0.723) | 0.566 (0.453 – 0.679) | 0.671 (0.577 – 0.765) | 0.578 (0.446 – 0.709) |
|                 | T-tau                     | 0.527 (0.477 – 0.576) | 0.528 (0.433 – 0.623) | 0.568 (0.451 – 0.685) | 0.539 (0.435 – 0.642) | 0.550 (0.437 – 0.663) |
|                 | P-tau181                  | 0.701 (0.656 – 0.746) | 0.519 (0.418 – 0.619) | 0.589 (0.471 – 0.706) | 0.719 (0.628 – 0.809) | 0.776 (0.663 – 0.888) |
|                 | NfL                       | 0.670 (0.626 – 0.714) | 0.647 (0.555 – 0.740) | 0.589 (0.477 – 0.701) | 0.580 (0.476 – 0.683) | 0.507 (0.356 – 0.658) |
|                 | A $\beta$ 42/A $\beta$ 40 | 0.652 (0.605 – 0.698) | 0.637 (0.538 – 0.736) | 0.560 (0.448 – 0.671) | 0.636 (0.537 – 0.735) | 0.652 (0.532 – 0.772) |
| ADNI Cohort     | A $\beta$ 40              | 0.567 (0.500 – 0.635) | 0.664 (0.553 – 0.774) | NA                    | 0.541 (0.438 – 0.644) | NA                    |
|                 | A $\beta$ 42              | 0.555 (0.487 – 0.624) | 0.516 (0.400 – 0.633) | NA                    | 0.584 (0.482 – 0.685) | NA                    |
|                 | T-tau                     | 0.552 (0.393 – 0.712) | 0.505 (0.245 – 0.766) | NA                    | 0.564 (0.251 – 0.877) | NA                    |
|                 | P-tau181                  | 0.733 (0.673 – 0.794) | 0.617 (0.498 – 0.736) | NA                    | 0.731 (0.638 – 0.824) | NA                    |
|                 | NfL                       | 0.650 (0.585 – 0.716) | 0.618 (0.503 – 0.732) | NA                    | 0.611 (0.509 – 0.713) | NA                    |
|                 | A $\beta$ 42/A $\beta$ 40 | 0.630 (0.564 – 0.695) | 0.587 (0.467 – 0.707) | NA                    | 0.658 (0.562 – 0.755) | NA                    |

All values were shown in AUROC values and the corresponding 95% confidence intervals.

**Supplementary Table 4. Statistics in models for different diagnostic status**

|              |               | AUC (95% CI)          | Sensitivity | Specificity | PPV   | NPV   | Accuracy | CV Error |
|--------------|---------------|-----------------------|-------------|-------------|-------|-------|----------|----------|
| All Patients | Full Model    | 0.935 (0.915 - 0.955) | 83.0%       | 91.4%       | 84.9% | 90.3% | 88.3%    | 0.914    |
|              | Best Model    | 0.830 (0.794 - 0.865) | 65.6%       | 88.8%       | 77.4% | 81.6% | 80.3%    | 0.805    |
|              | Refined Model | 0.708 (0.671 - 0.745) | 47.8%       | 90.9%       | 75.4% | 74.9% | 75.0%    | 0.752    |
| CN           | Full Model    | 0.957 (0.916 - 0.997) | 89.1%       | 96.4%       | 85.4% | 97.4% | 95.0%    | 1.104    |
|              | Best Model    | 0.824 (0.752 - 0.896) | 56.5%       | 93.8%       | 68.4% | 90.0% | 86.6%    | 1.016    |
|              | Refined Model | 0.689 (0.608 - 0.769) | 65.2%       | 68.8%       | 33.3% | 89.2% | 68.1%    | 1.085    |
| SCD          | Full Model    | 0.933 (0.875 - 0.991) | 86.1%       | 95.1%       | 88.6% | 94.0% | 92.5%    | 1.162    |
|              | Best Model    | 0.817 (0.740 - 0.894) | 86.1%       | 67.1%       | 53.4% | 91.7% | 72.9%    | 1.025    |
|              | Refined Model | 0.817 (0.740 - 0.894) | 86.1%       | 67.1%       | 53.4% | 91.7% | 72.9%    | 1.025    |
| MCI          | Full Model    | 0.967 (0.939 - 0.995) | 94.3%       | 92.7%       | 89.3% | 96.2% | 93.3%    | 0.626    |
|              | Best Model    | 0.933 (0.888 - 0.978) | 88.7%       | 93.9%       | 90.4% | 92.8% | 91.9%    | 0.491    |
|              | Refined Model | 0.887 (0.829 - 0.944) | 88.7%       | 80.5%       | 74.6% | 91.7% | 83.7%    | 0.666    |
| aMCI         | Full Model    | 0.972 (0.942 - 1.00)  | 89.7%       | 94.4%       | 92.1% | 92.7% | 92.5%    | 0.448    |
|              | Best Model    | 0.958 (0.921 - 0.994) | 94.9%       | 88.9%       | 86.0% | 96.0% | 91.4%    | 0.458    |
|              | Refined Model | 0.890 (0.835 - 0.946) | 94.9%       | 70.4%       | 69.8% | 95.0% | 80.6%    | 0.699    |
| Dementia     | Full Model    | 0.971 (0.948 - 0.995) | 89.9%       | 93.1%       | 97.6% | 75.0% | 90.7%    | 1.423    |
|              | Best Model    | 0.855 (0.769 - 0.941) | 91.0%       | 72.4%       | 91.0% | 72.4% | 86.4%    | 1.108    |
|              | Refined Model | 0.755 (0.656 - 0.853) | 91.0%       | 58.6%       | 87.1% | 68.0% | 83.1%    | 1.072    |

PPV: positive predictive value; NPV: negative predictive value.



**Supplementary Table 5. Statistics in models for different diagnostic status in ADNI**

|              |                      | AUC (95% CI)          | Sensitivity | Specificity | PPV   | NPV   | Accuracy | CV Error |
|--------------|----------------------|-----------------------|-------------|-------------|-------|-------|----------|----------|
| All Patients | <b>Full Model</b>    | 0.955 (0.931 - 0.979) | 92.6%       | 90.2%       | 92.6% | 90.2% | 91.5%    | 0.777    |
|              | <b>Best Model</b>    | 0.883 (0.844 - 0.923) | 79.6%       | 84.4%       | 87.2% | 75.7% | 81.7%    | 0.866    |
|              | <b>Refined Model</b> | 0.750 (0.695 - 0.805) | 65.4%       | 79.5%       | 80.9% | 63.4% | 71.5%    | 0.865    |
| CN           | <b>Full Model</b>    | 0.912 (0.847 - 0.977) | 88.9%       | 83.6%       | 76.2% | 92.7% | 85.6%    | 0.926    |
|              | <b>Best Model</b>    | 0.855 (0.779 - 0.931) | 72.2%       | 88.5%       | 78.8% | 84.4% | 82.5%    | 1.131    |
|              | <b>Refined Model</b> | 0.713 (0.629 - 0.789) | 41.7%       | 88.5%       | 68.2% | 72.0% | 71.1%    | 1.158    |
| MCI          | <b>Full Model</b>    | 0.950 (0.913 - 0.986) | 92.6%       | 87.5%       | 90.0% | 90.7% | 90.3%    | 0.761    |
|              | <b>Best Model</b>    | 0.932 (0.889 - 0.974) | 80.9%       | 91.1%       | 91.7% | 79.7% | 85.5%    | 0.681    |
|              | <b>Refined Model</b> | 0.869 (0.806 - 0.933) | 83.8%       | 83.9%       | 86.4% | 81.0% | 83.9%    | 0.623    |

**Supplementary Table 6. Statistics in disease stage prediction models**

|                    | <b>AUC (95% CI)</b>   | <b>Sensitivity</b> | <b>Specificity</b> | <b>PPV</b> | <b>NPV</b> | <b>Accuracy</b> | <b>CV Error</b> |
|--------------------|-----------------------|--------------------|--------------------|------------|------------|-----------------|-----------------|
| <b>AD vs. CN</b>   | 0.931 (0.898 - 0.964) | 84.3%              | 91.2%              | 78.1%      | 93.9%      | 89.3%           | 0.806           |
| <b>AD vs. SCD</b>  | 0.914 (0.873 - 0.956) | 84.3%              | 93.2%              | 90.4%      | 88.7%      | 89.4%           | 0.617           |
| <b>AD vs. MCI</b>  | 0.916 (0.877 - 0.955) | 84.3%              | 85.9%              | 79.8%      | 89.2 %     | 85.3%           | 0.839           |
| <b>SCD vs. MCI</b> | 0.749 (0.691 – 0.806) | 71.1%              | 71.2%              | 73.8%      | 68.3%      | 71.1%           | 1.096           |
| <b>CN vs. SCD</b>  | 0.738 (0.684 – 0.791) | 51.7%              | 85.3%              | 63.5%      | 78.1%      | 74.2%           | 1.173           |
| <b>CN vs. MCI</b>  | 0.695 (0.653 – 0.737) | 92.6%              | 36.1%              | 45.1%      | 89.6%      | 56.6%           | 1.120           |

**Supplementary Table 7. Detailed accuracies of prediction models in patients with comorbidities and family histories**

|                      | AD Family History |       |         | Diabetes History |       |         | HLP History  |       |         | Hypertension History |       |         |
|----------------------|-------------------|-------|---------|------------------|-------|---------|--------------|-------|---------|----------------------|-------|---------|
|                      | All patients      | With  | Without | All patients     | With  | Without | All patients | With  | Without | All patients         | With  | Without |
| <b>Full Model</b>    | 88.3%             | 90.4% | 89.0%   | 88.3%            | 82.0% | 89.3%   | 88.3%        | 85.1% | 88.8%   | 88.3%                | 87.7% | 88.4%   |
| <b>Best Model</b>    | 80.3%             | 77.9% | 82.2%   | 80.3%            | 79.8% | 80.5%   | 80.3%        | 77.2% | 81.1%   | 80.3%                | 79.3% | 81.0%   |
| <b>Refined Model</b> | 75.0%             | 74.0% | 76.9%   | 75.0%            | 69.7% | 75.9%   | 75.0%        | 70.3% | 75.9%   | 75.0%                | 72.4% | 76.3%   |

Accuracy values were calculated under the optimal Youden threshold of each prediction model.

**Supplementary Table 8. Important values for the variables of full model of full data.**

|        |          |        |              |                 |       |       |
|--------|----------|--------|--------------|-----------------|-------|-------|
| MMSE   | P-tau181 | MoCA_B | A $\beta$ 40 | A $\beta$ 42/40 | NFL   | AB42  |
| 54.17  | 49.14    | 41.68  | 26.22        | 25.30           | 23.89 | 23.67 |
| ACEIII | Edu_yrs  | Age    | T-tau        | APOE            | BMI   | Sex   |
| 21.92  | 19.51    | 16.86  | 15.98        | 15.54           | 12.54 | 2.90  |

**Supplementary Table 9. Important values for the variables of best model of full data.**

|       |          |                 |         |      |
|-------|----------|-----------------|---------|------|
| MMSE  | P-tau181 | A $\beta$ 42/40 | Edu_yrs | Age  |
| 49.19 | 37.80    | 17.41           | 11.16   | 6.58 |

**Supplementary Table 10. Important values for the variables of refined model of full data.**

|       |          |                 |         |      |
|-------|----------|-----------------|---------|------|
| MMSE  | P-tau181 | A $\beta$ 42/40 | Edu_yrs | Age  |
| 48.55 | 21.47    | 3.28            | 2.64    | 1.71 |

**Supplementary Table 11. Important values for the variables of full model of negative control (NC) data.**

|              |              |          |        |                 |             |      |
|--------------|--------------|----------|--------|-----------------|-------------|------|
| A $\beta$ 42 | A $\beta$ 40 | NfL      | T-tau  | A $\beta$ 42/40 | <i>APOE</i> | Age  |
| 27.61        | 22.52        | 11.64    | 10.44  | 8.47            | 8.37        | 8.23 |
| BMI          | Edu_yrs      | P-tau181 | MOCA_B | MMSE            | ACEIII      | Sex  |
| 3.91         | 3.19         | 2.46     | 0.48   | 0.47            | 0.45        | 0.32 |

**Supplementary Table 12. Important values for the variables of best model of NC data.**

|       |      |          |             |
|-------|------|----------|-------------|
| NfL   | Age  | P-tau181 | <i>APOE</i> |
| 19.97 | 8.71 | 8.03     | 2.58        |

**Supplementary Table 13. Important values for the variables of refined model of NC data.**

|      |          |      |
|------|----------|------|
| NfL  | P-tau181 | Age  |
| 5.68 | 4.74     | 2.27 |

**Supplementary Table 14. Important values for the variables of full model of subjective cognitive decline (SCD) data.**

|          |              |              |      |                 |       |      |
|----------|--------------|--------------|------|-----------------|-------|------|
| Edu_yrs  | A $\beta$ 40 | A $\beta$ 42 | NfL  | A $\beta$ 42/40 | T-tau | APOE |
| 11.73    | 11.58        | 11.12        | 7.52 | 4.84            | 4.22  | 1.50 |
| P-tau181 | ACEIII       | <i>BMI</i>   | Age  | MOCA_B          | MMSE  |      |
| 1.44     | 1.34         | 1.11         | 1.06 | 1.06            | 0.69  |      |

**Supplementary Table 15. Important values for the variables of best model of SCD data.**

|         |              |
|---------|--------------|
| Edu_yrs | A $\beta$ 40 |
| 8.10    | 7.83         |

**Supplementary Table 16. Important values for the variables of refined model of SCD data.**

|         |              |
|---------|--------------|
| Edu_yrs | A $\beta$ 40 |
| 8.10    | 7.83         |

**Supplementary Table 17. Important values for the variables of full model of mild cognitive impairment (MCI) data.**

|           |              |                 |              |        |             |      |
|-----------|--------------|-----------------|--------------|--------|-------------|------|
| P-tau 181 | A $\beta$ 40 | A $\beta$ 42/40 | A $\beta$ 42 | T-tau  | <i>APOE</i> | Age  |
| 22.83     | 16.17        | 13.14           | 12.75        | 9.82   | 7.89        | 3.22 |
| NfL       | Sex          | Edu_yrs         | MOCA B       | ACEIII | BMI         | MMSE |
| 2.83      | 2.52         | 1.64            | 1.28         | 0.85   | 0.75        | 0.33 |

**Supplementary Table 18. Important values for the variables of full model of MCI data.**

|           |              |                 |             |
|-----------|--------------|-----------------|-------------|
| P-tau 181 | A $\beta$ 40 | A $\beta$ 42/40 | <i>APOE</i> |
| 22.01     | 15.46        | 12.55           | 8.79        |

**Supplementary Table 19. Important values for the variables of refined model of MCI data.**

|           |              |                 |             |
|-----------|--------------|-----------------|-------------|
| P-tau 181 | A $\beta$ 40 | A $\beta$ 42/40 | <i>APOE</i> |
| 18.15     | 11.60        | 6.77            | 0.26        |

**Supplementary Table 20. Important values for the variables of full model of amnesic MCI (aMCI) data.**

|          |              |              |             |       |      |                 |
|----------|--------------|--------------|-------------|-------|------|-----------------|
| P-tau181 | A $\beta$ 42 | A $\beta$ 40 | <i>APOE</i> | T-tau | Age  | A $\beta$ 42/40 |
| 17.10    | 11.00        | 7.67         | 6.40        | 4.03  | 3.65 | 3.54            |
| BMI      | NfL          | Edu_yrs      | MOCA B      | Sex   | MMSE |                 |
| 2.54     | 1.86         | 1.31         | 1.31        | 0.87  | 0.60 |                 |

**Supplementary Table 21. Important values for the variables of best model of aMCI data.**

|           |              |              |             |
|-----------|--------------|--------------|-------------|
| P-tau 181 | A $\beta$ 42 | A $\beta$ 40 | <i>APOE</i> |
| 17.10     | 11.00        | 8.33         | 6.32        |

**Supplementary Table 22. Important values for the variables of refined model of aMCI data.**

|           |              |              |
|-----------|--------------|--------------|
| P-tau 181 | A $\beta$ 42 | A $\beta$ 40 |
| 13.63     | 6.55         | 6.37         |

**Supplementary Table 23. Important values for the variables of full model of dementia data.**

|             |       |              |      |              |                 |        |
|-------------|-------|--------------|------|--------------|-----------------|--------|
| P-tau 181   | NfL   | A $\beta$ 42 | AGE  | A $\beta$ 40 | A $\beta$ 42/40 | T-tau  |
| 16.52       | 13.24 | 6.02         | 4.82 | 4.70         | 4.70            | 3.60   |
| <i>APOE</i> | BMI   | ACEIII       | MMSE | Sex          | Edu_yrs         | MOCA B |
| 2.61        | 2.08  | 1.96         | 1.34 | 1.08         | 0.38            | 0.27   |

**Supplementary Table 24. Important values for the variables of best model of dementia data.**

|           |      |      |             |
|-----------|------|------|-------------|
| P-tau 181 | NfL  | AGE  | <i>APOE</i> |
| 14.85     | 8.66 | 4.41 | 1.17        |

**Supplementary Table 25. Important values for the variables of refined model of dementia data.**

|           |      |      |             |
|-----------|------|------|-------------|
| P-tau 181 | NfL  | AGE  | <i>APOE</i> |
| 11.25     | 2.02 | 1.92 | 0.67        |
